# Supplementary material for: Synthesis of benzothiazole–benzoxazole dendrimers with triazole as bridging unit and their application in dye-sensitized solar cells
Source: Royal Society of Chemistry journal article supplement (doi:10.1039/c3nj00887h), 2013-01-01
Supplement: c3nj00887h.pdf [file c3nj00887h.pdf]

## Supporting Information

# Synthesis of Benzothiazole/Benzoxazole dendrimers with triazole as bridging unit and their application in Dye-sensitized solar cell

Perumal Rajakumar,<sup>\*a</sup> Venkatesan Kalpana,<sup>a</sup> Shanmugam Ganesan,<sup>b</sup> Pichai Maruthamuthu<sup>b</sup>

## Table of contents

**Fabrication of cell assembly:** Page 3

**Spectroscopic data:** Page 4

### **Fabrication of cell assembly**

The DSSC, whose photo active area being  $1 \text{ cm}^2$  ( $1 \text{ cm} \times 1 \text{ cm}$ ), was fabricated on a conducting glass covered with Fluorinated Tin Oxide ( $\text{F:SnO}_2$ ) (FTO) and nano-crystalline  $\text{TiO}_2$  (degussa) cast by the procedure reported earlier.<sup>26</sup> The electrodes were immersed in a  $5 \times 10^{-5} \text{ M}$  solution of the photo sensitizer namely, cis-dithiocyanato bis(2,2'-bipyridyl-4,4'-dicarboxylate)-ruthenium(II) (N3 dye) in ethanol for 20 h at room temperature before being washed with ethanol and dried in air. The dendrimer based electrolyte solution was injected into the space between two electrodes. The electrolyte solution was composed of  $2.2 \times 10^{-4} \text{ M}$  of KI,  $3 \times 10^{-5} \text{ M}$  of  $\text{I}_2$ ,  $8.5 \times 10^{-6} \text{ M}$  of the dendrimer additives in DMF (10 mL) solvent. Subsequently, the platinum counter electrode was pressed on top of the polymer film without any special sealing. With the aid of a BAS 100A Electrochemical Analyzer, photovoltaic tests of the fabricated DSSCs were carried out by measuring the current–voltage (I–V) characteristics under illumination of  $70 \text{ mWcm}^{-2}$  condition using 150W Xe lamp as light source.

**$^1\text{H}$  and  $^{13}\text{C}$  NMR spectra of compounds 7, 11, 13, 14, 16, 2, 4 and 5**

## Spectroscopic data

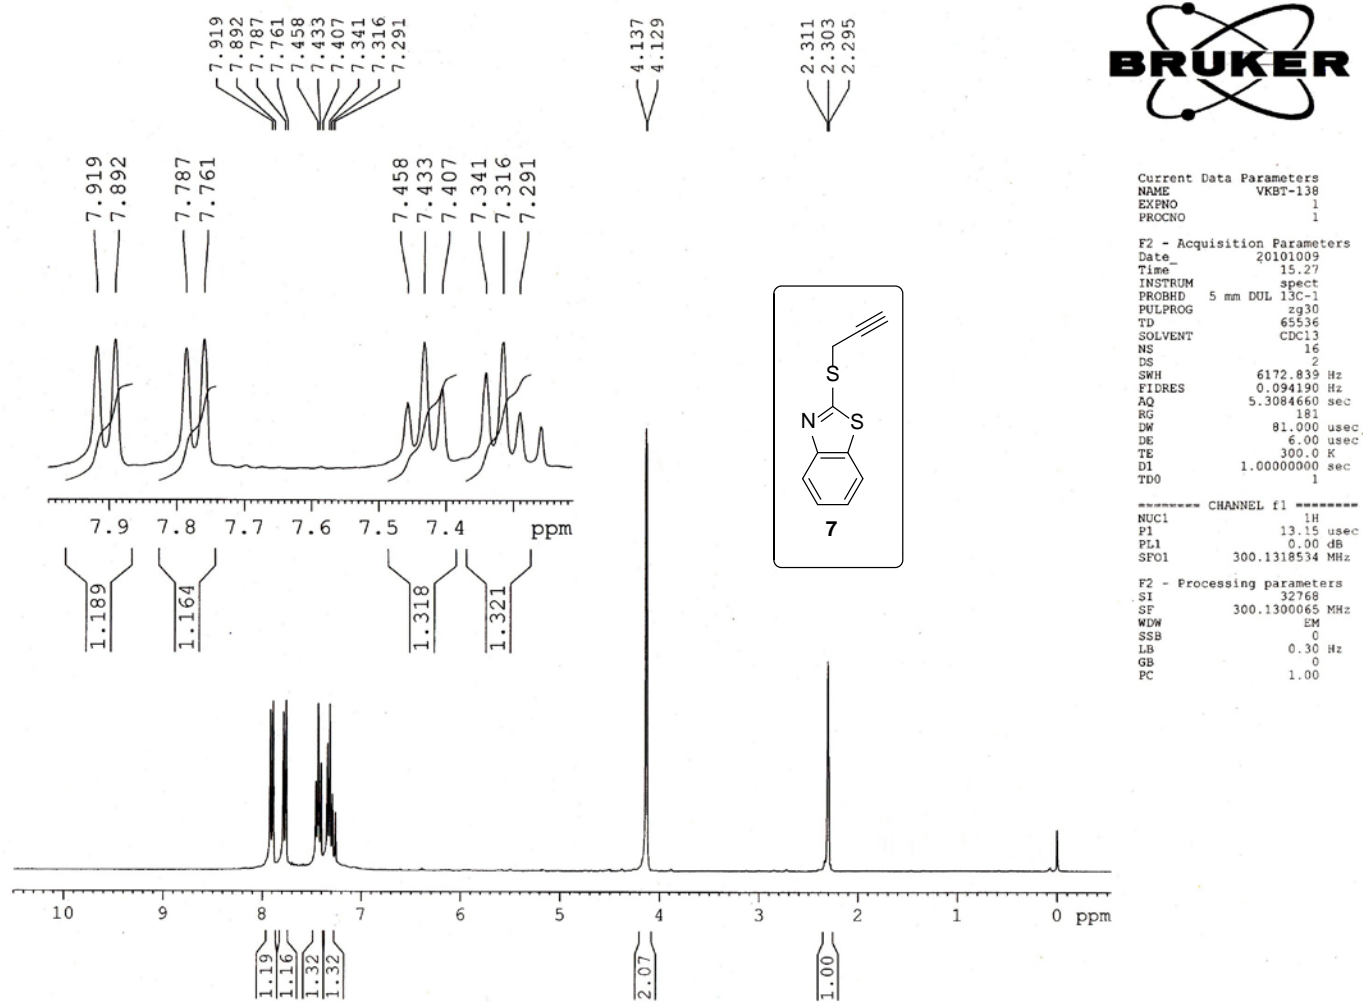

<sup>1</sup>H NMR Spectrum (CDCl<sub>3</sub>, 300 MHz) of the compound 7

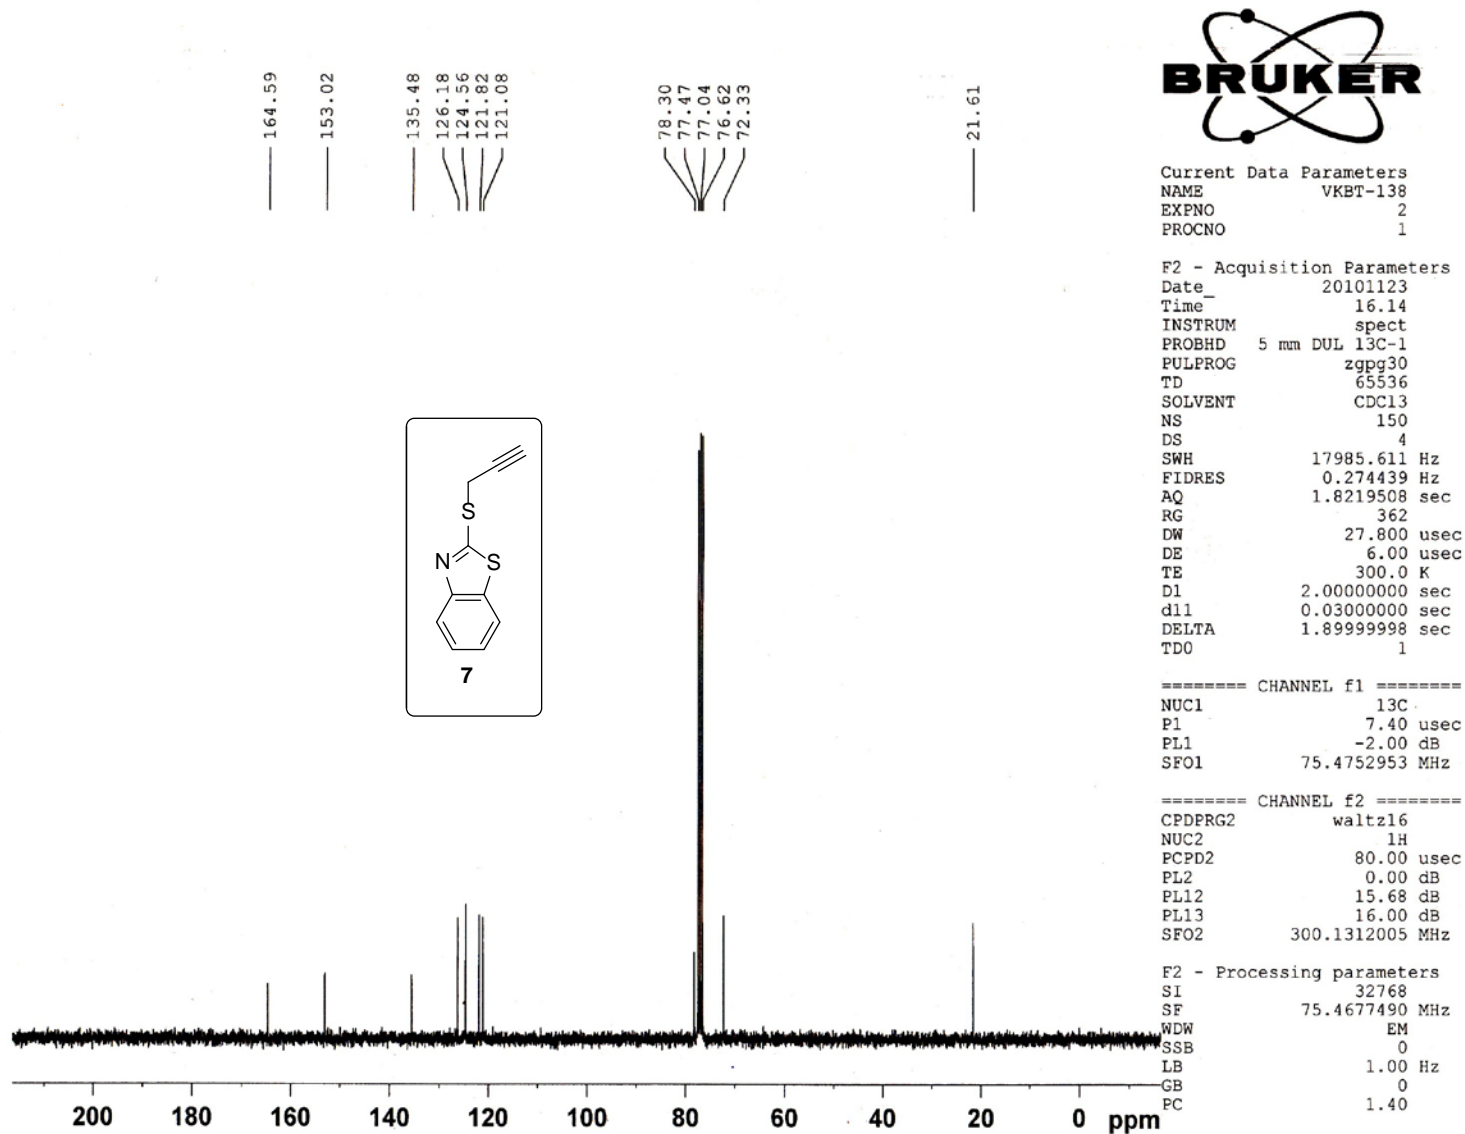

<sup>13</sup>C NMR Spectrum (CDCl<sub>3</sub>, 75 MHz) of the compound 7

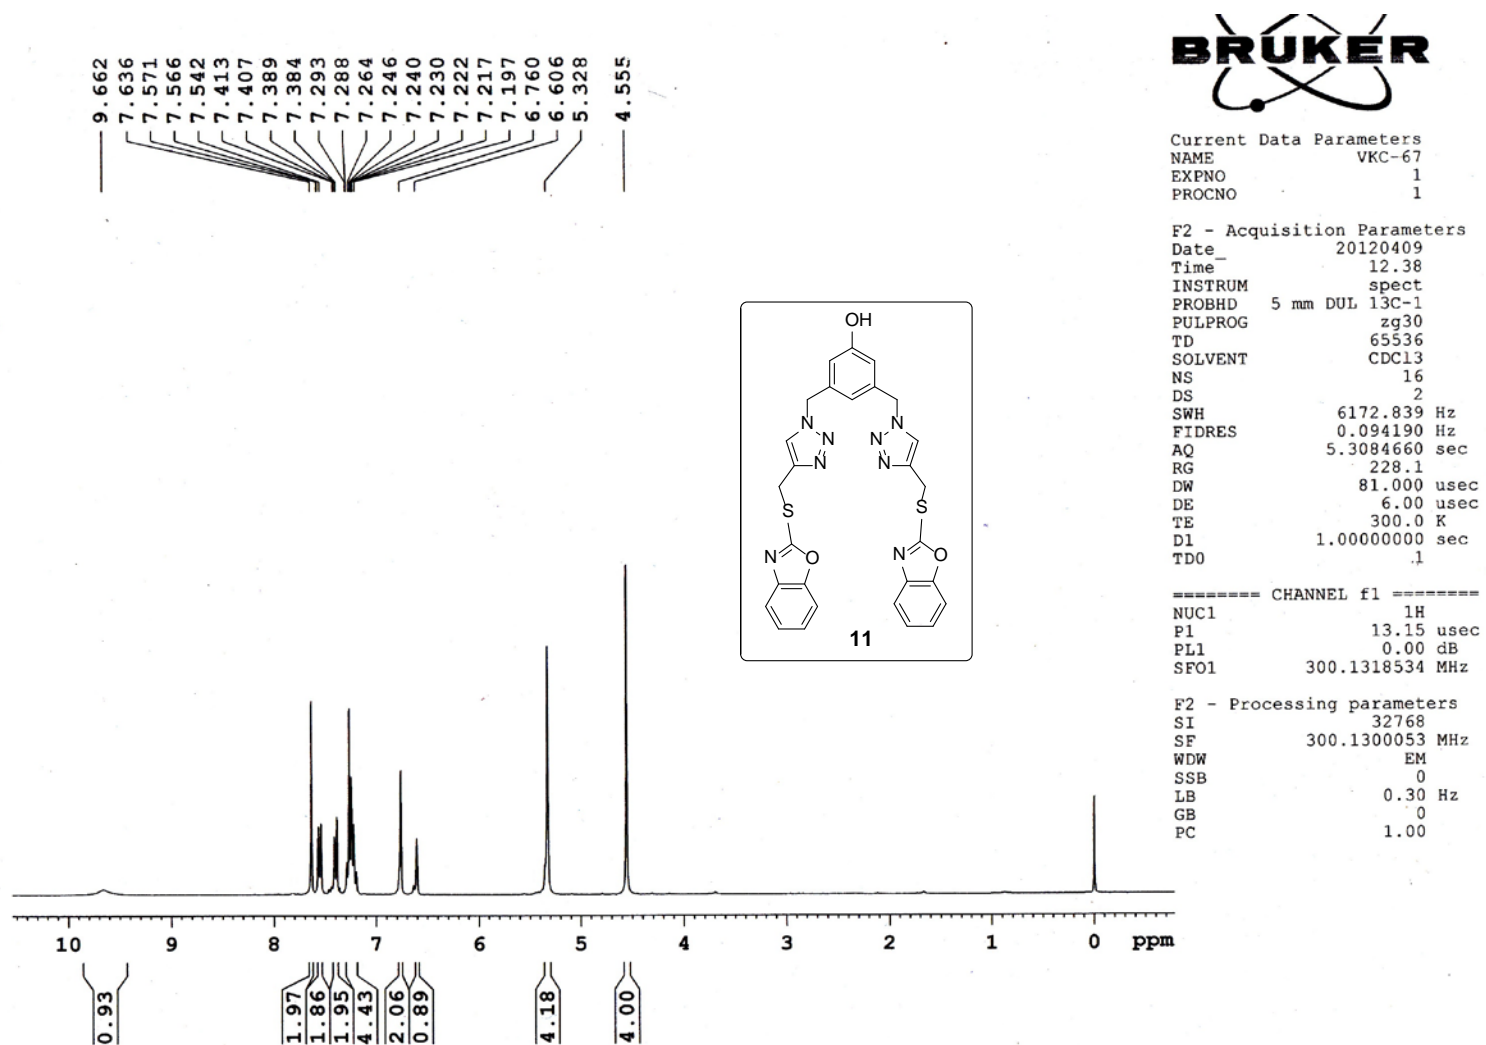

<sup>1</sup>H NMR Spectrum (CDCl<sub>3</sub>, 300 MHz) of the compound 11

UNIV. OF MADRAS

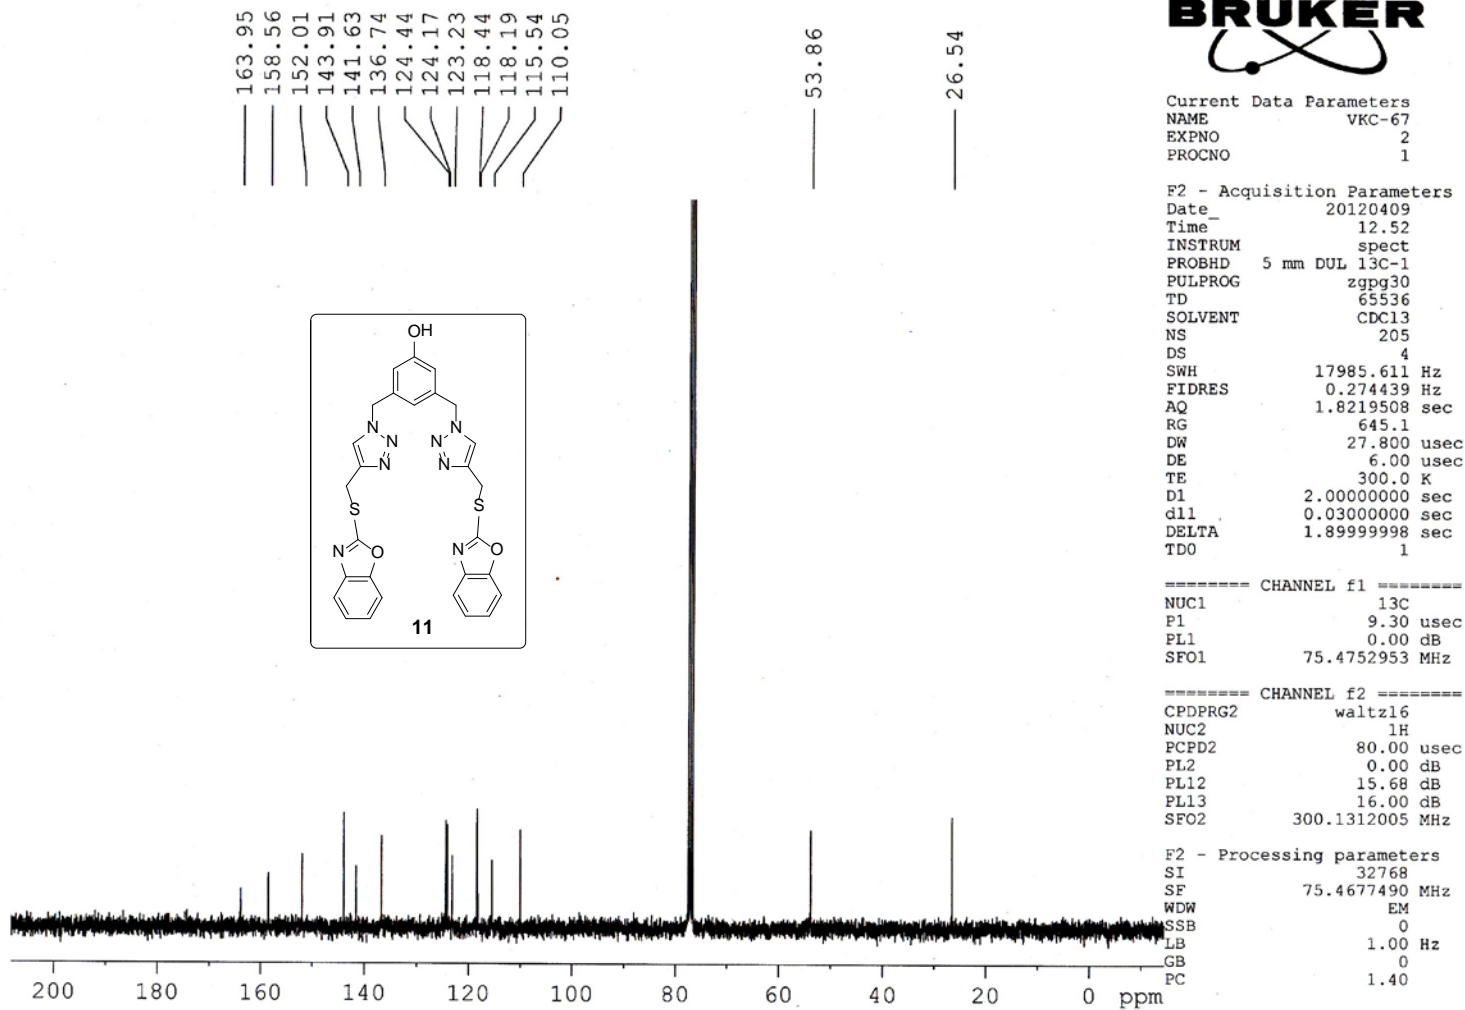

<sup>13</sup>C NMR Spectrum (CDCl<sub>3</sub>, 75 MHz) of the compound 11

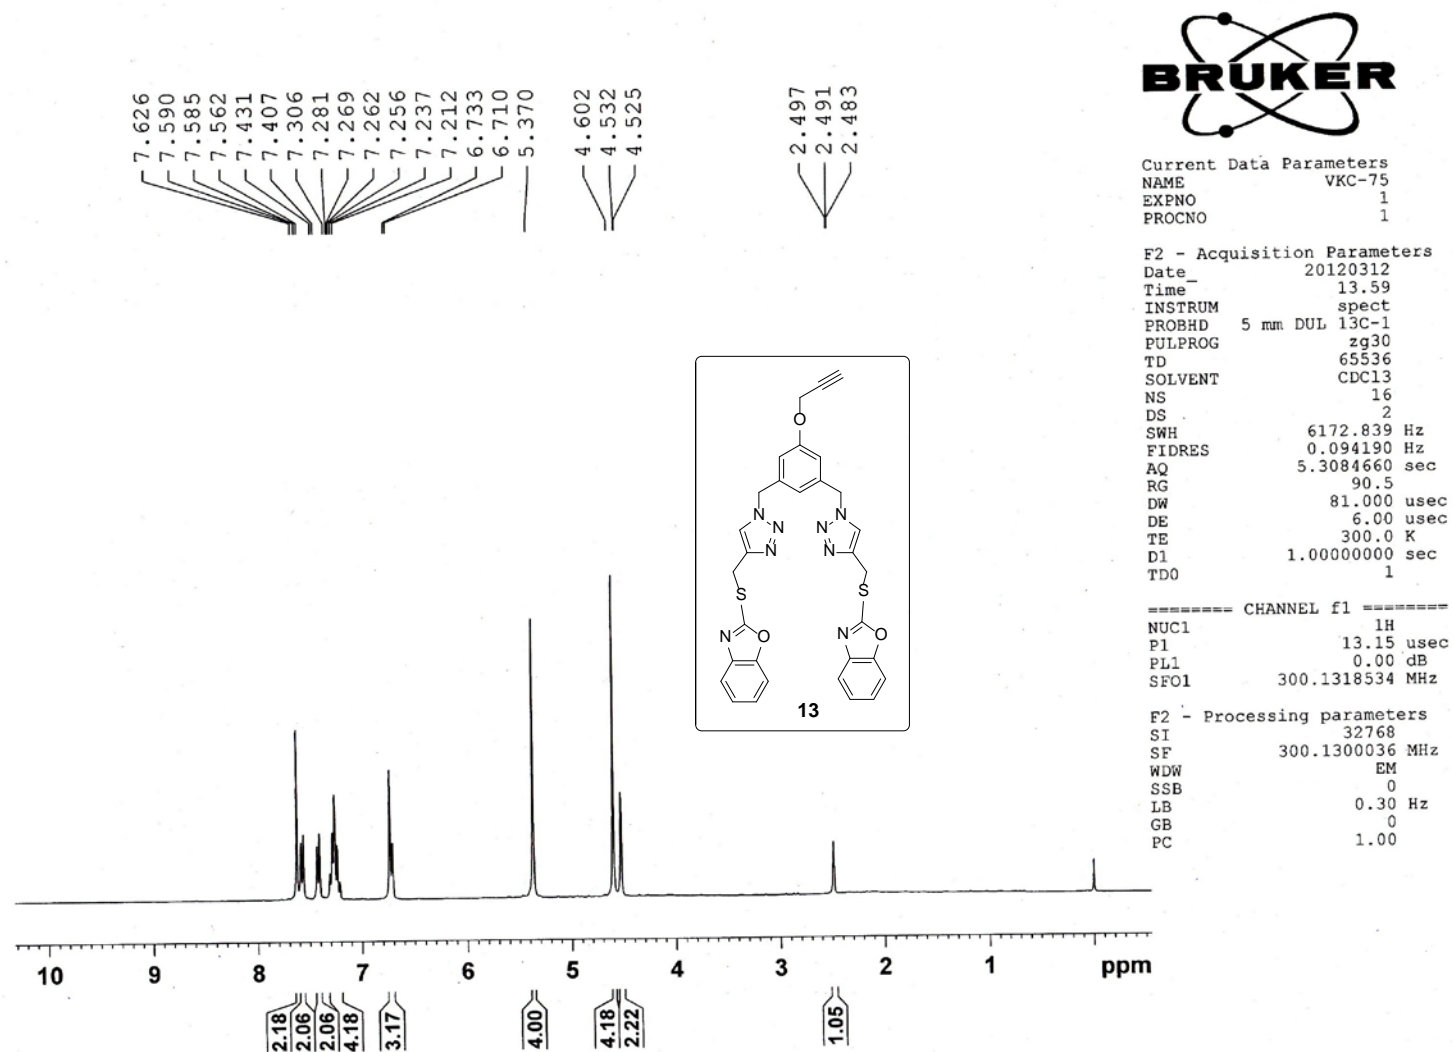

<sup>1</sup>H NMR Spectrum (CDCl<sub>3</sub>, 300 MHz) of the compound 13

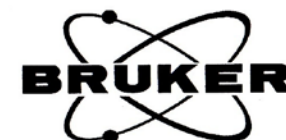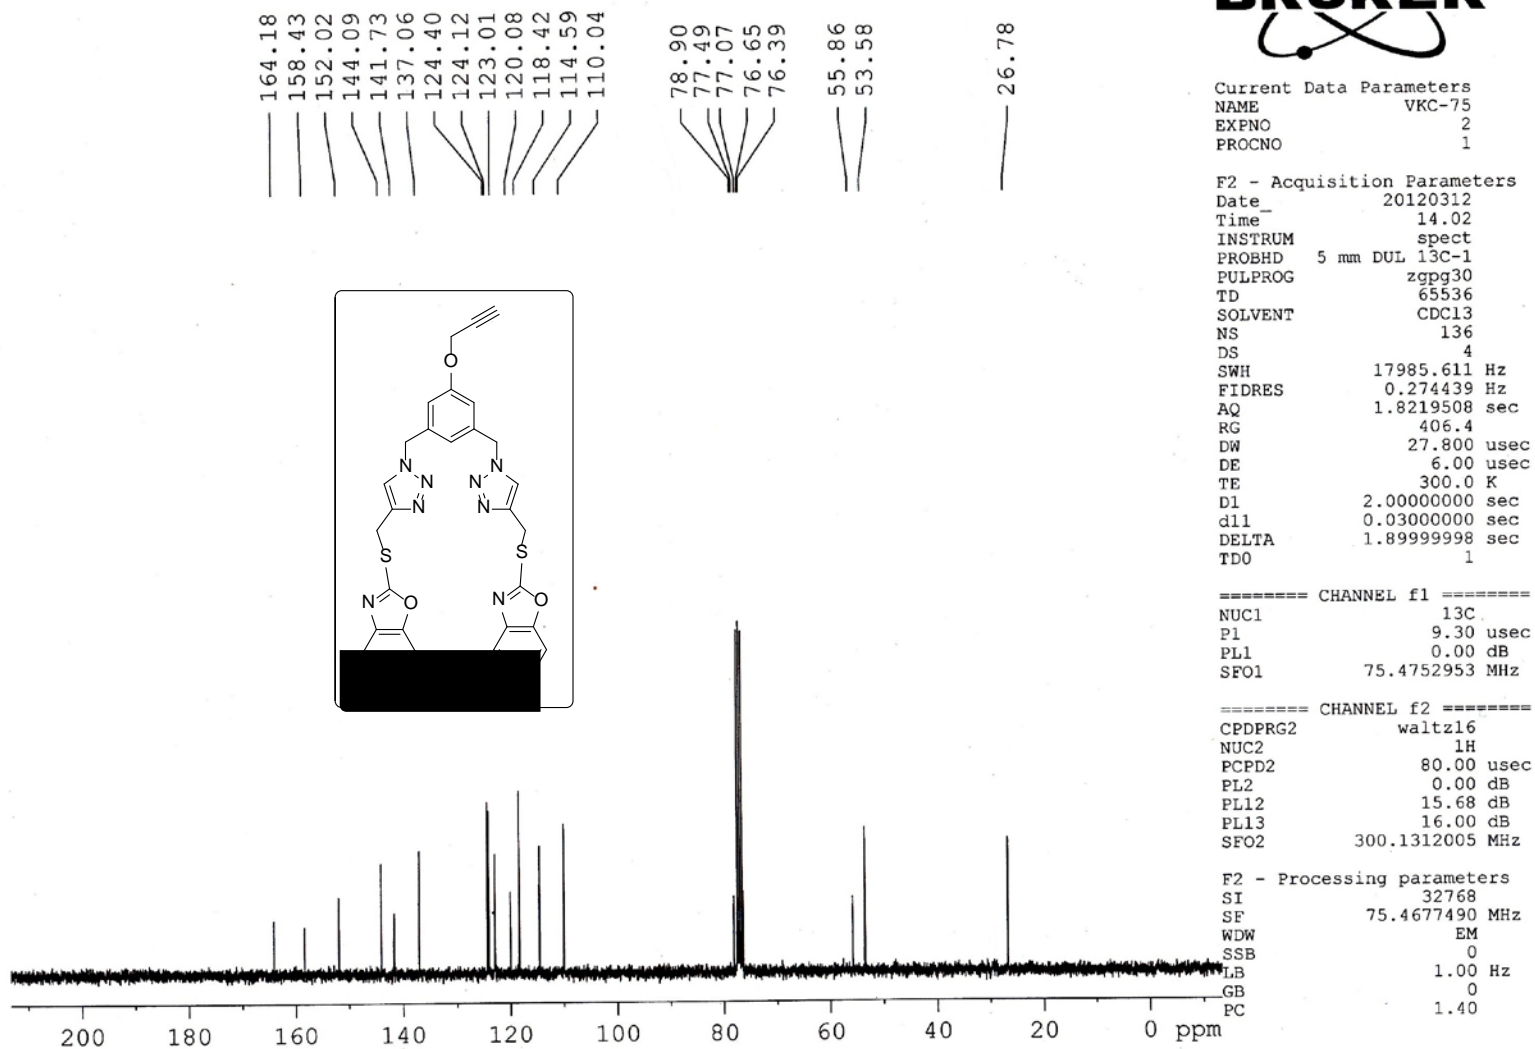

<sup>13</sup>C NMR Spectrum (CDCl<sub>3</sub>, 75 MHz) of the compound 13



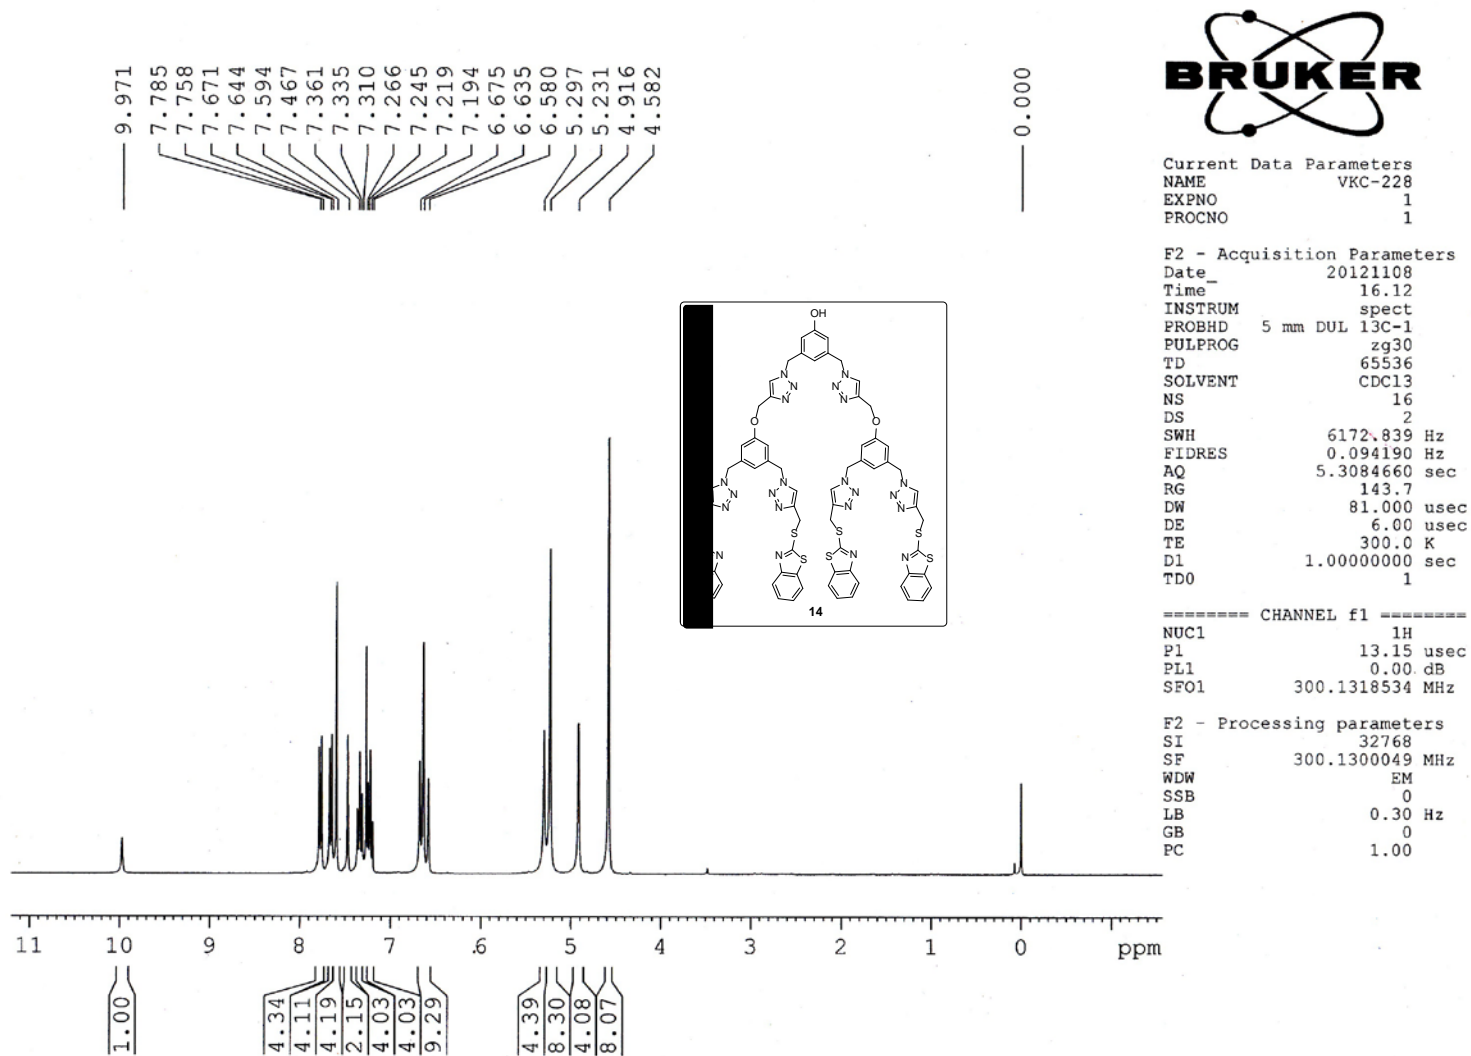

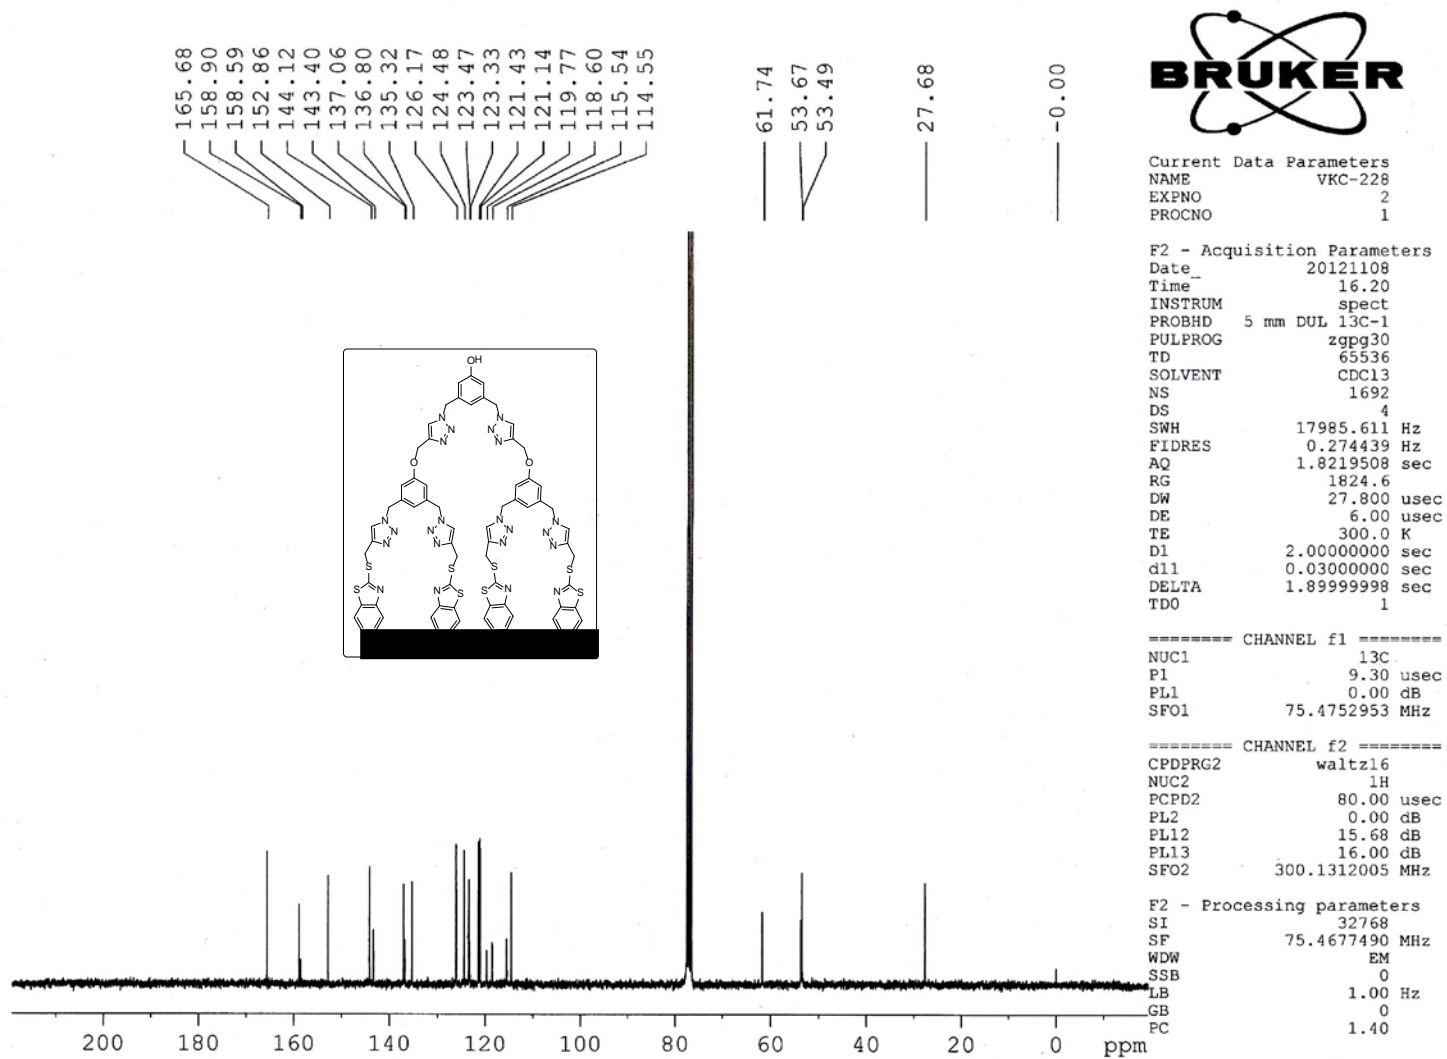

<sup>13</sup>C NMR Spectrum (CDCl<sub>3</sub>, 75 MHz) of the compound 14

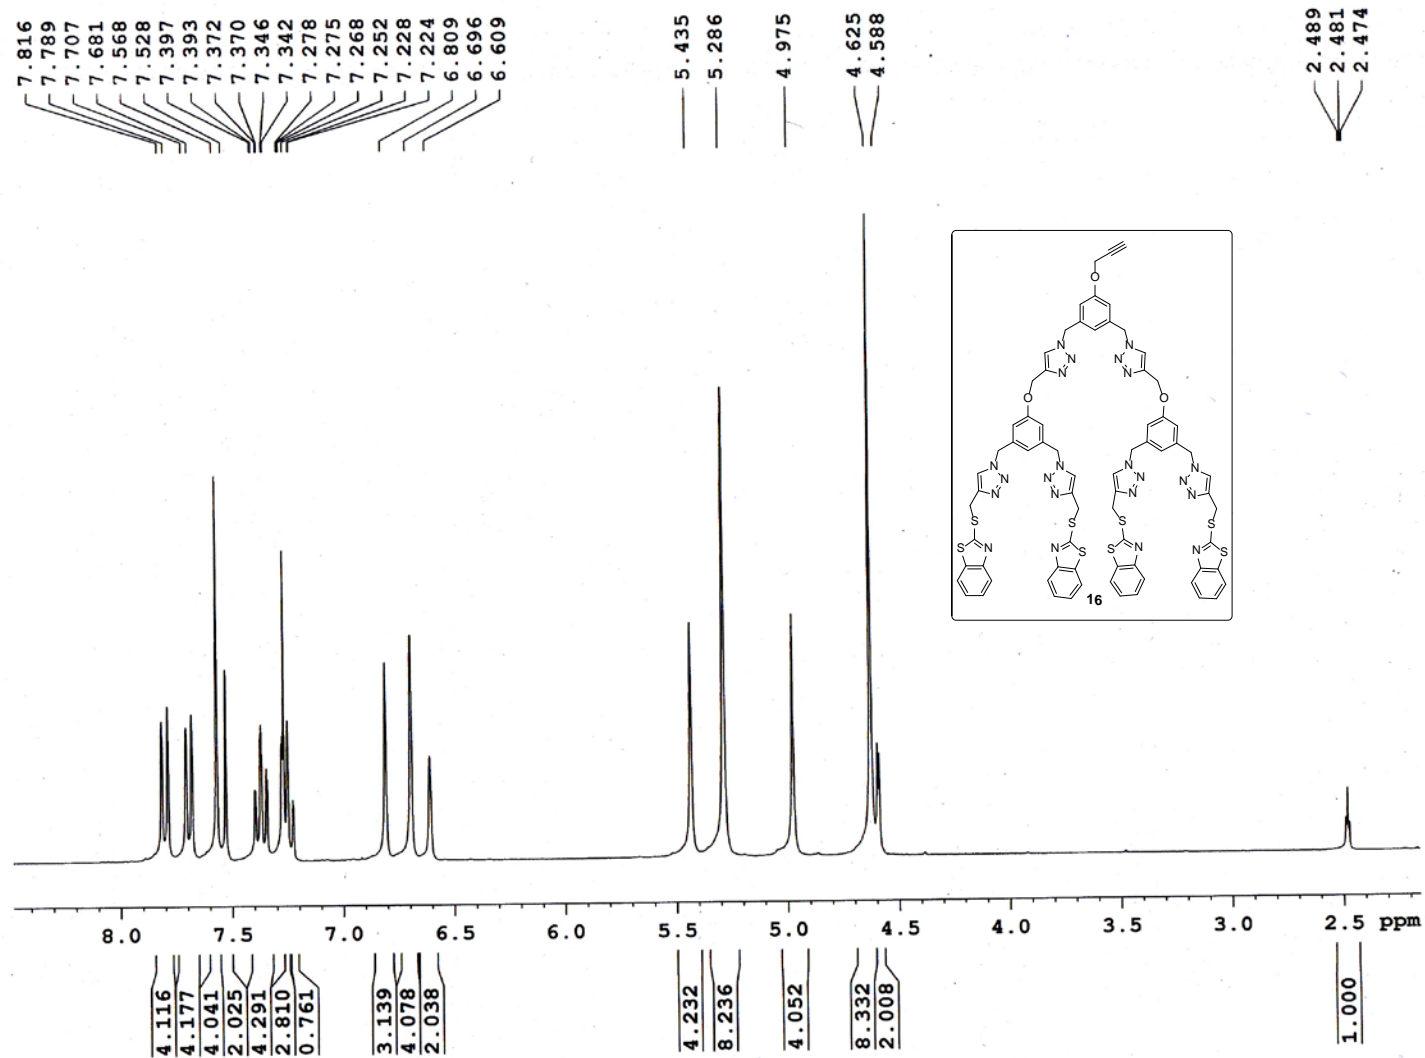

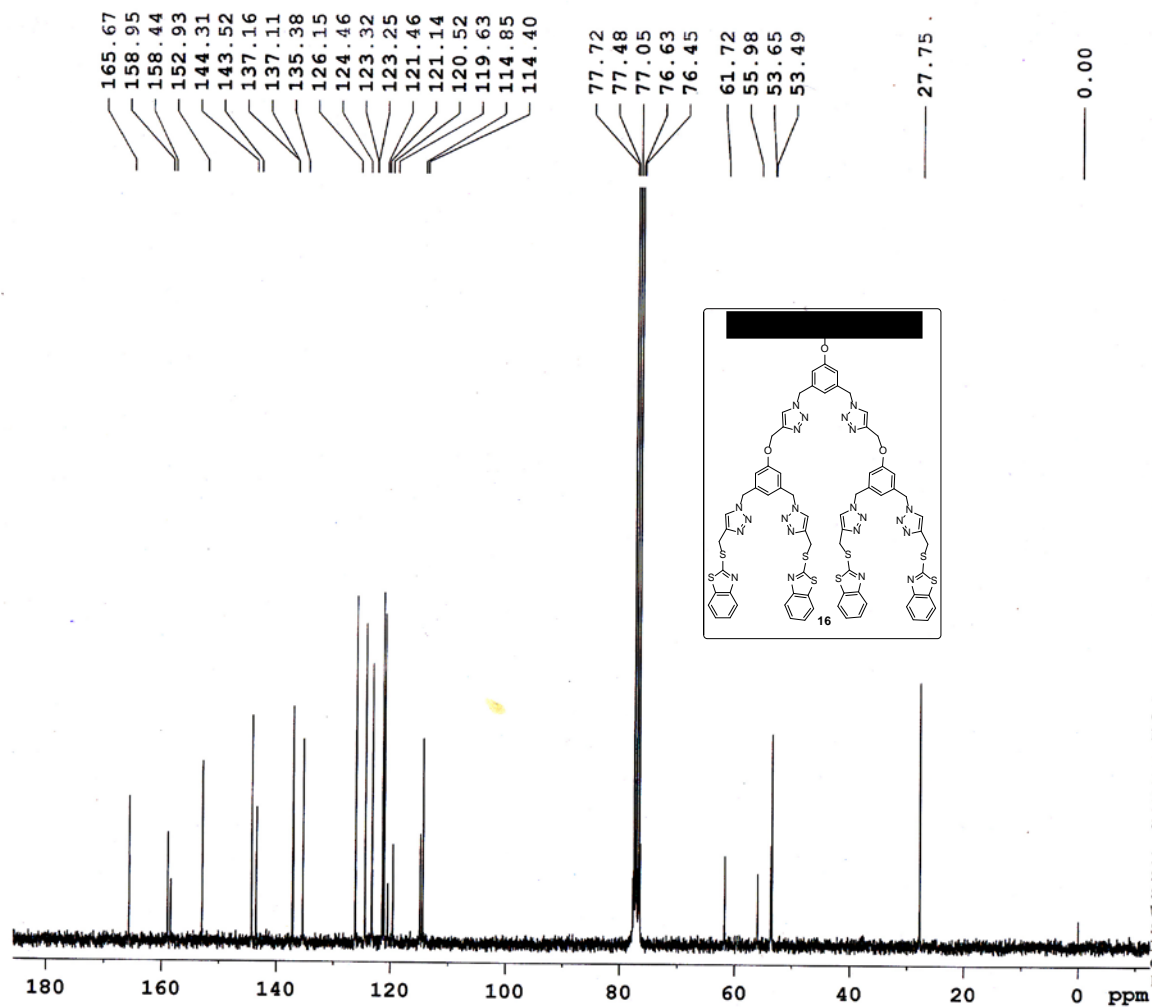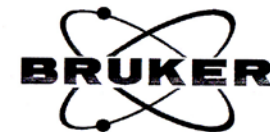

Current Data Parameters  
NAME VKC-232  
EXPNO 2  
PROCNO 1

F2 - Acquisition Parameters  
Date\_ 20121121  
Time\_ 16.08  
INSTRUM spect  
PROBHD 5 mm DUL 13C-1  
PULPROG zgpg30  
TD 65536  
SOLVENT CDCl3  
NS 1453  
DS 4  
SWH 17985.611 Hz  
FIDRES 0.274439 Hz  
AQ 1.8219508 sec  
RG 574.7  
DW 27.800 usec  
DE 6.00 usec  
TE 300.0 K  
D1 2.0000000 sec  
d11 0.0300000 sec  
DELTA 1.89999998 sec  
TDO 1

==== CHANNEL f1 =====  
NUC1 13C  
P1 9.30 usec  
PL1 0.00 dB  
SFO1 75.4752953 MHz

==== CHANNEL f2 =====  
CPDPRG2 waltz16  
NUC2 1H  
PCPD2 80.00 usec  
PL2 0.00 dB  
PL12 15.68 dB  
PL13 16.00 dB  
SFO2 300.1312005 MHz

F2 - Processing parameters  
SI 32768  
SF 75.4677490 MHz  
WDW EM  
SSB 0  
LB 1.00 Hz  
GB 0  
PC 1.40

<sup>13</sup>C NMR Spectrum (CDCl<sub>3</sub>, 75 MHz) of the compound 16

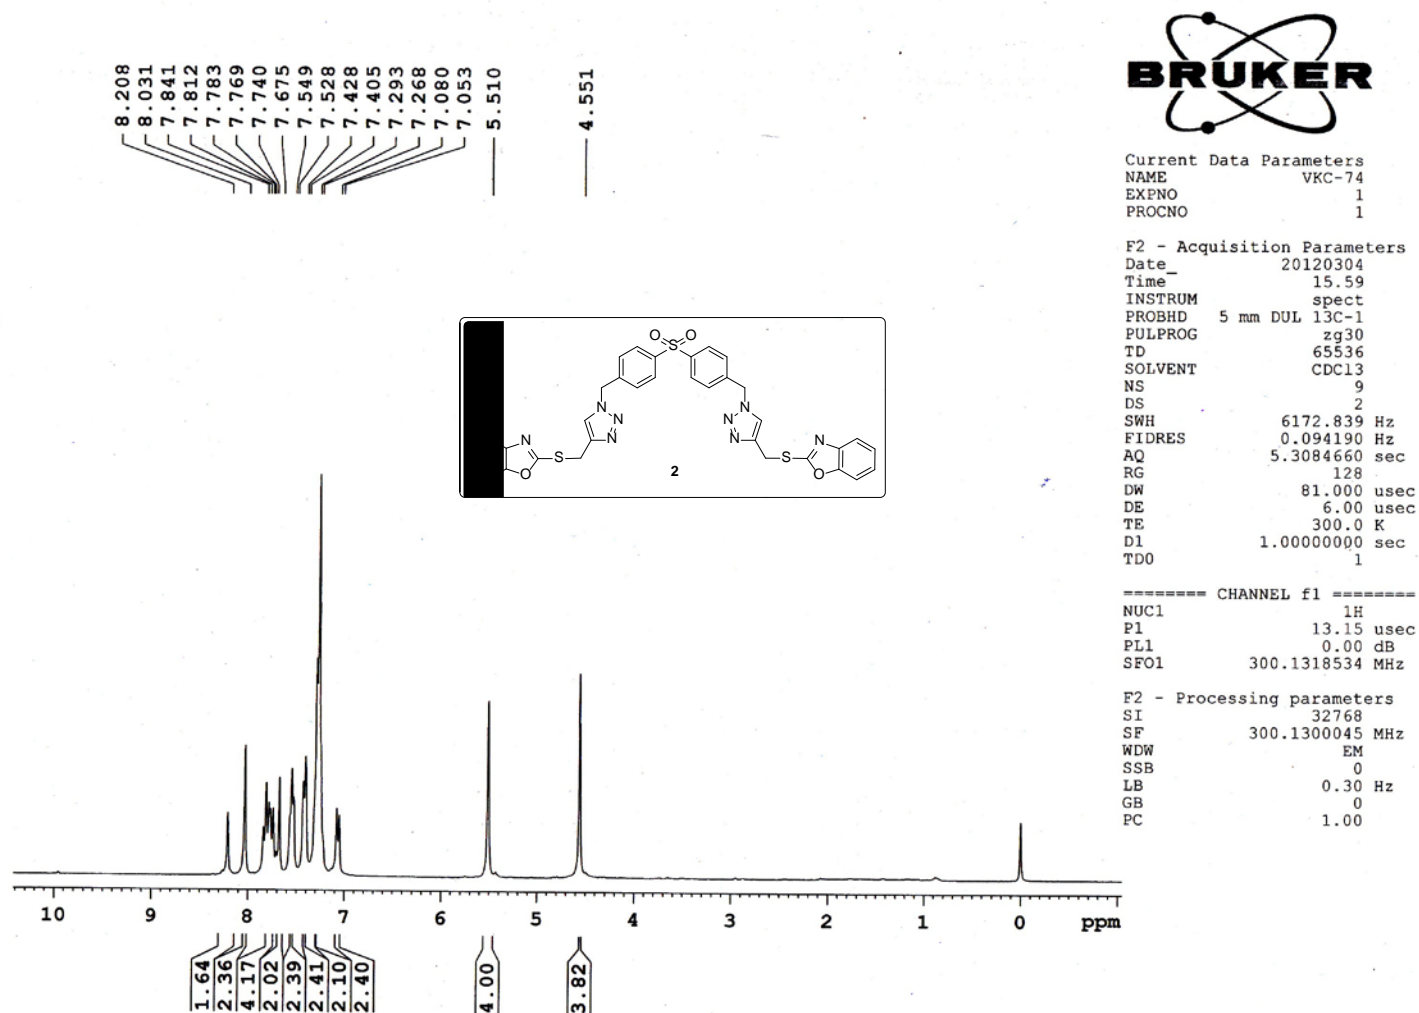

<sup>1</sup>H NMR Spectrum (CDCl<sub>3</sub>, 300 MHz) of the compound 2

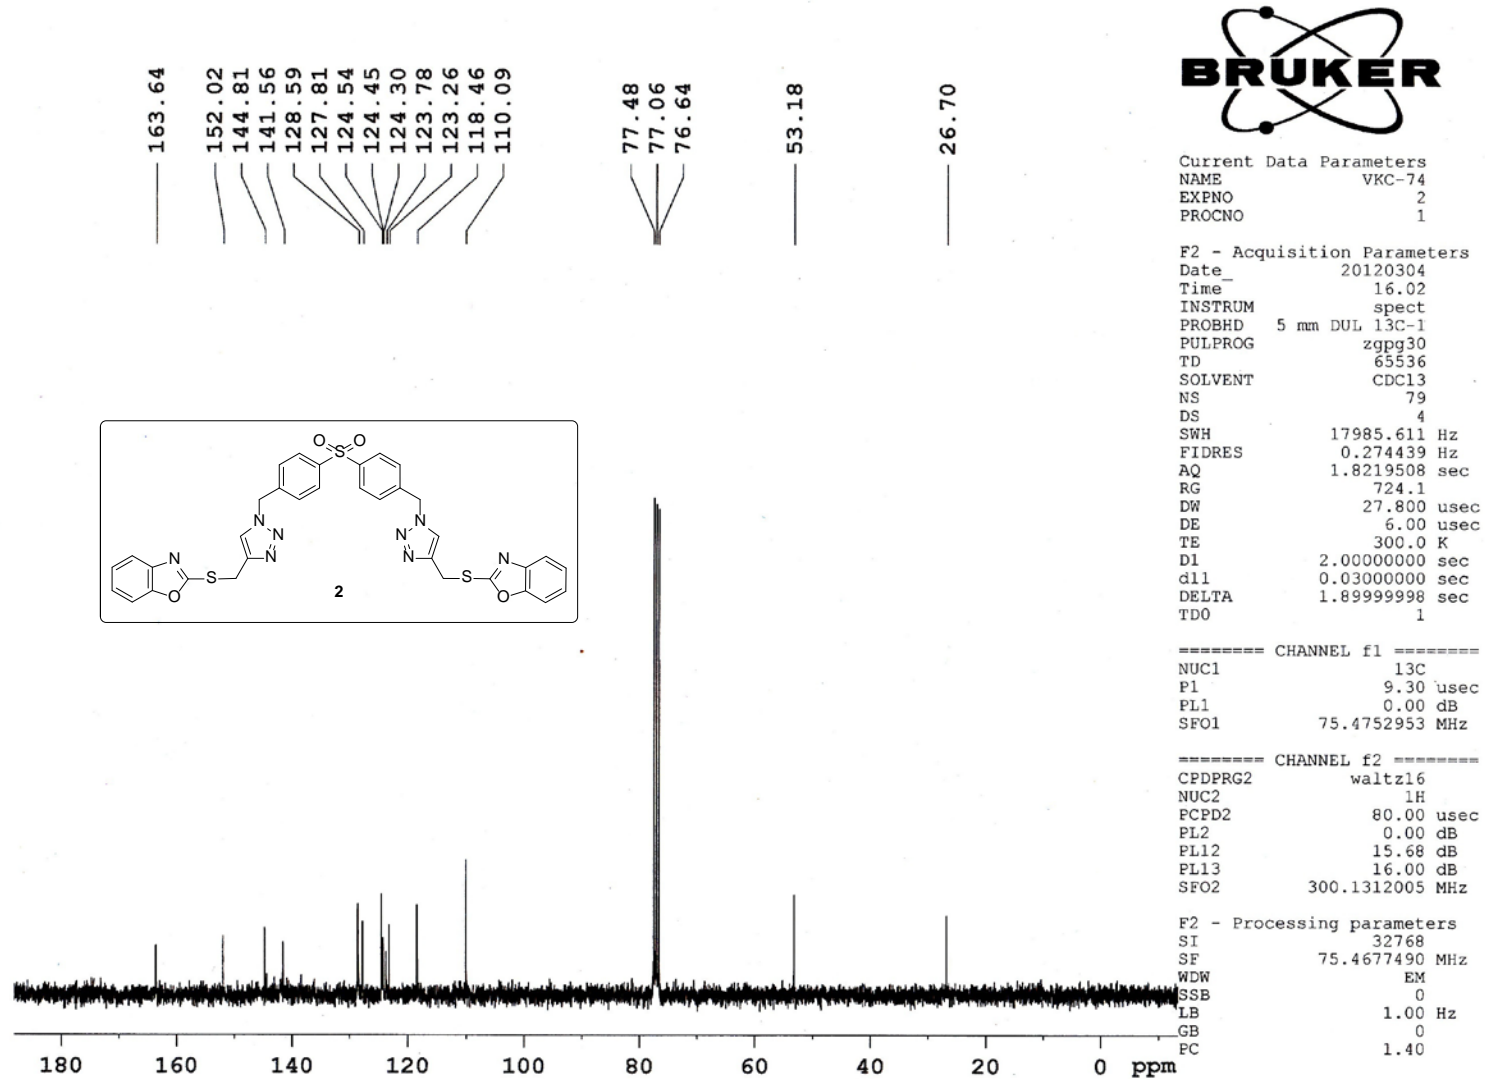

<sup>13</sup>C NMR Spectrum (CDCl<sub>3</sub>, 75 MHz) of the compound 2

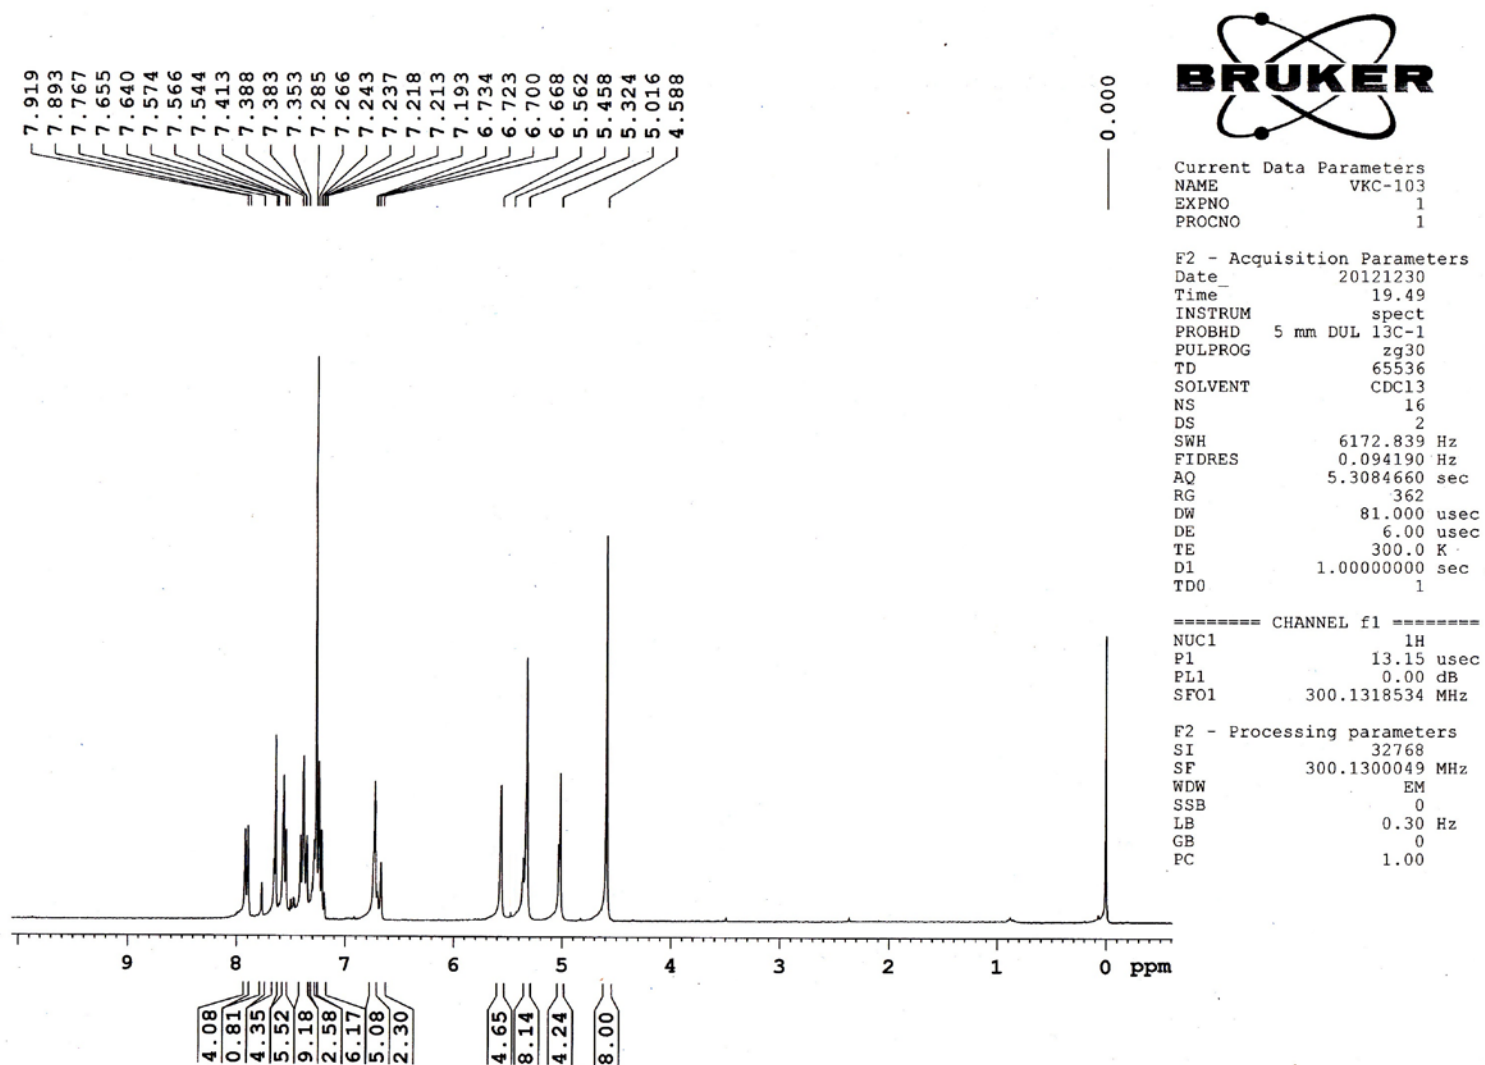

<sup>1</sup>H NMR Spectrum (CDCl<sub>3</sub>, 300 MHz) of the compound 4

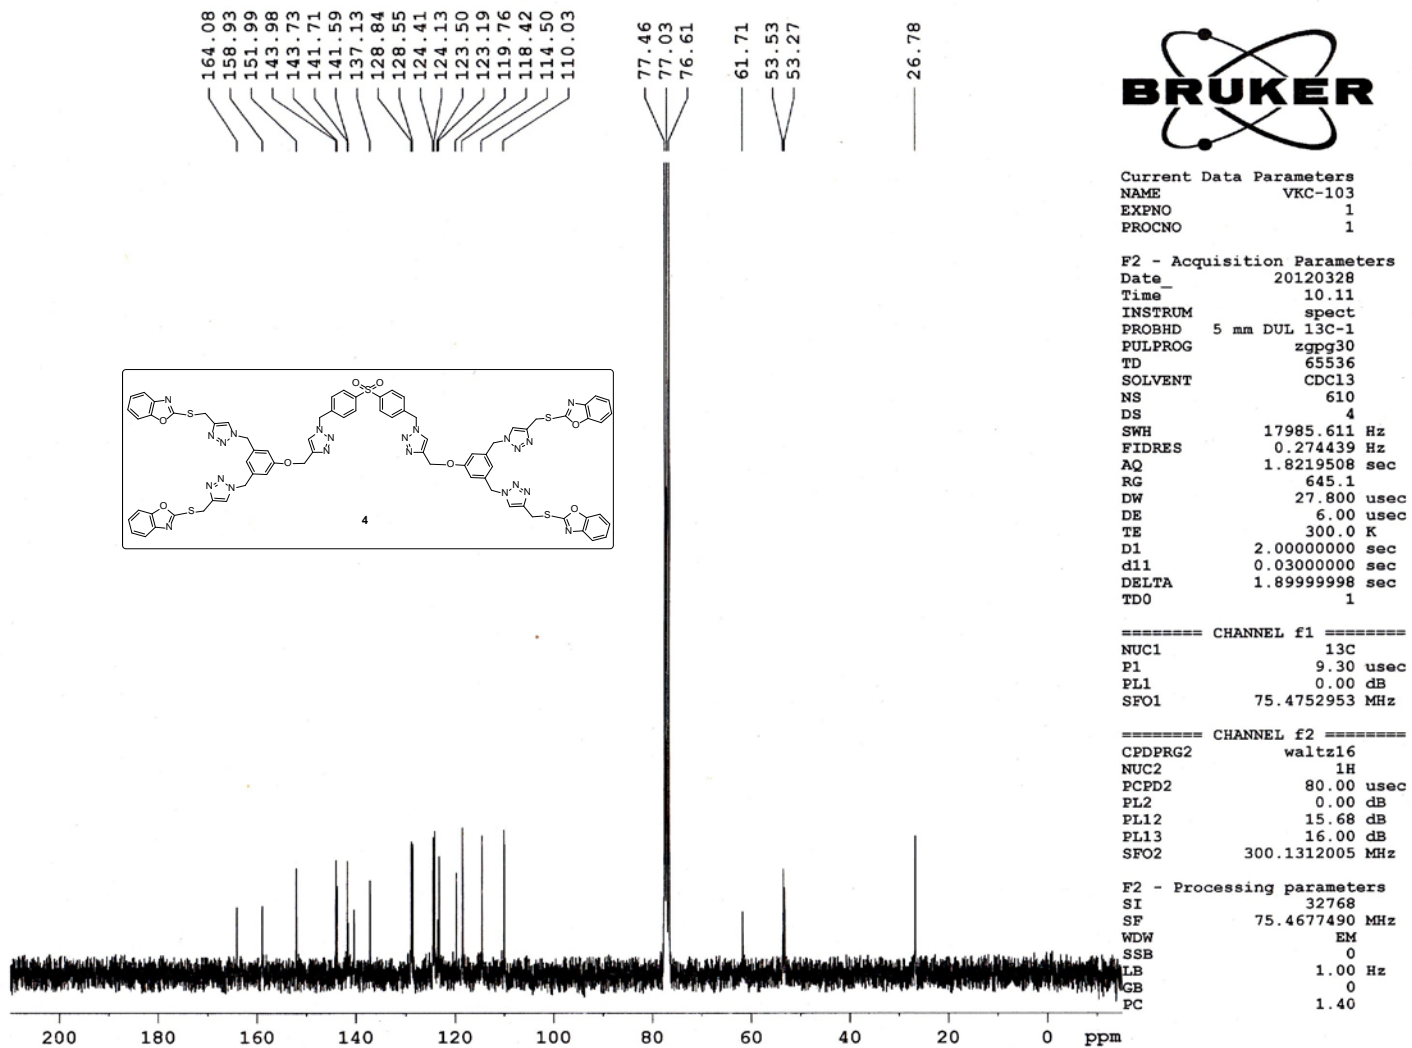

<sup>13</sup>C NMR Spectrum (CDCl<sub>3</sub>, 75 MHz) of the compound 4



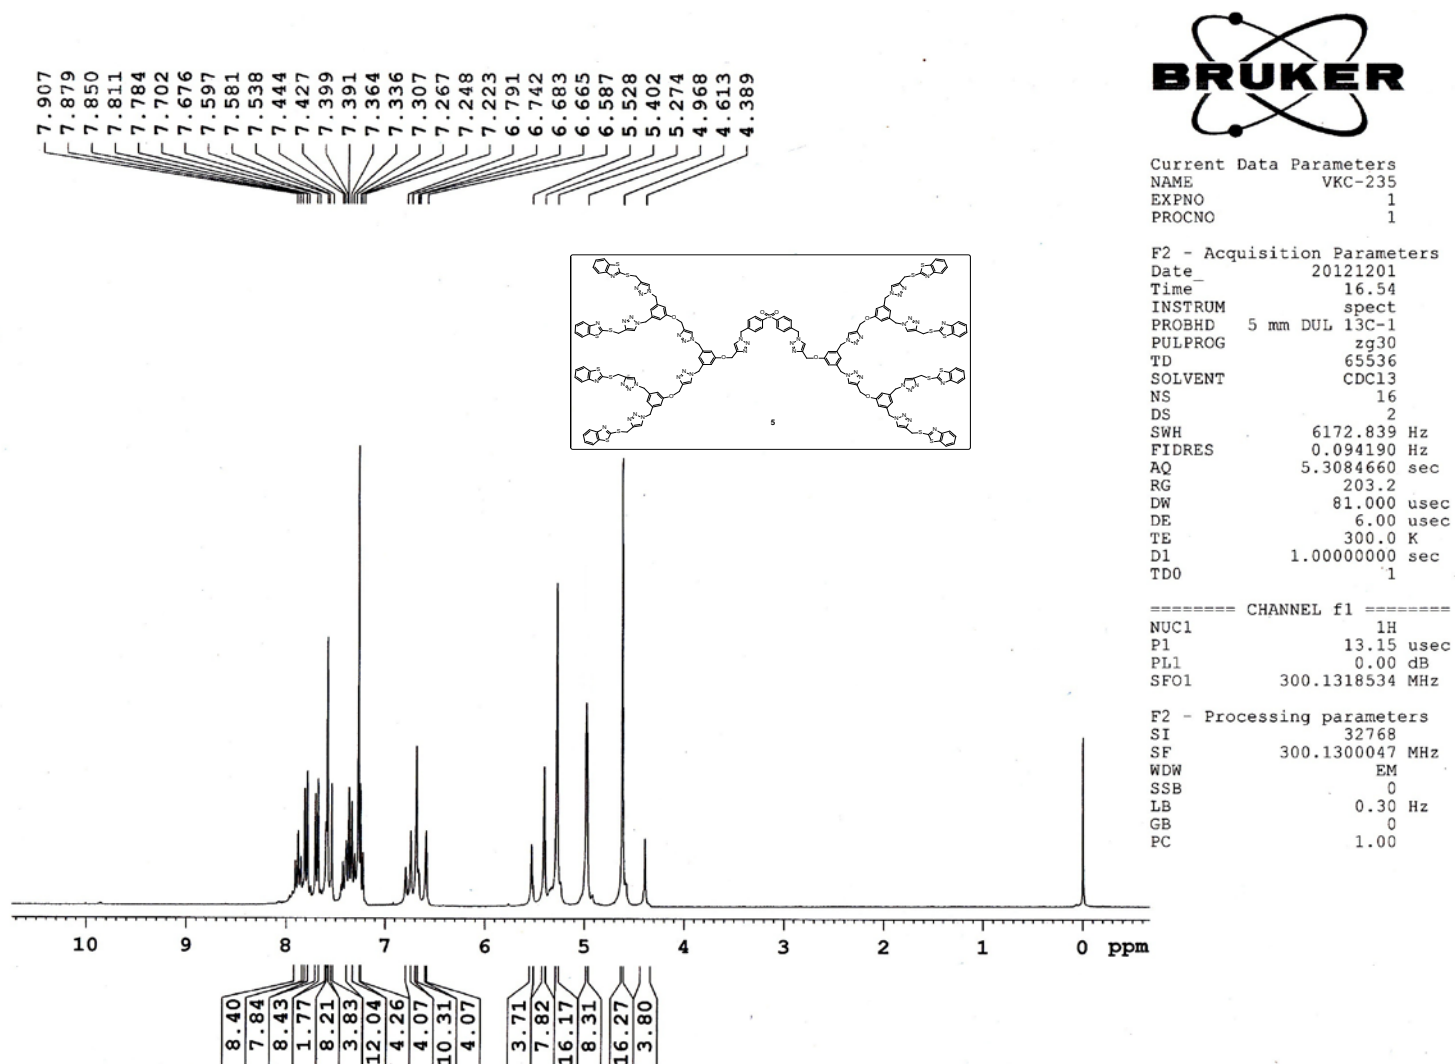

**<sup>1</sup>H NMR Spectrum (CDCl<sub>3</sub>, 300 MHz) of the compound 5**

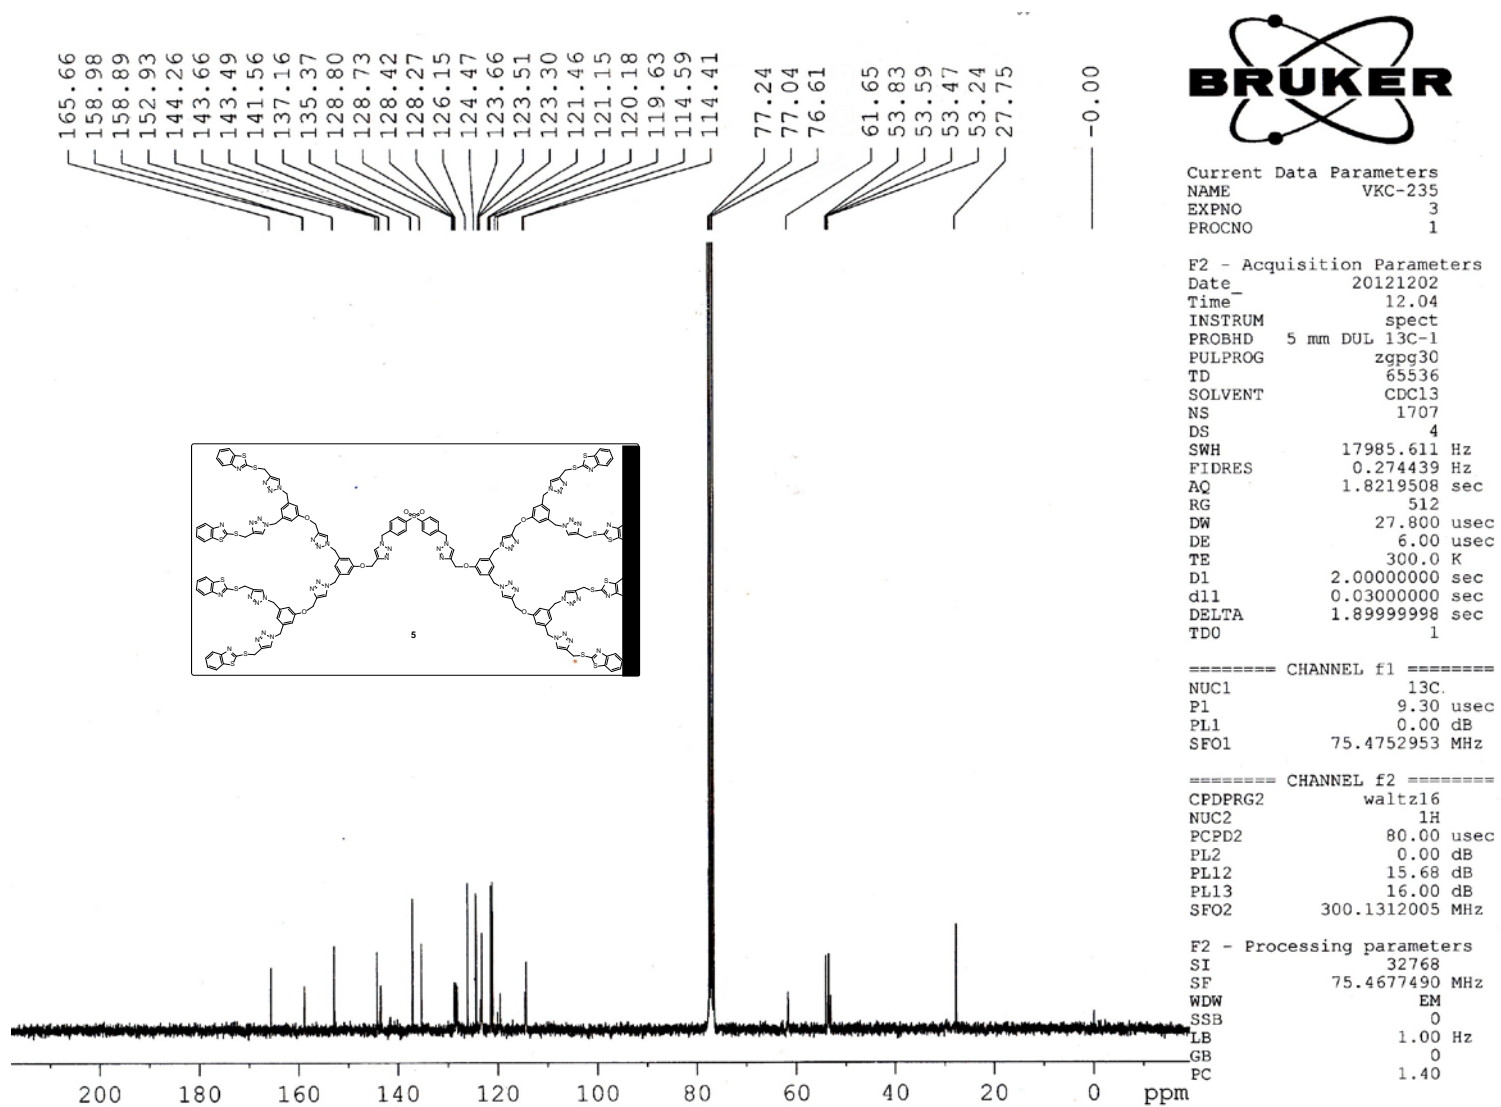

**<sup>13</sup>C NMR Spectrum (CDCl<sub>3</sub>, 75 MHz) of the compound 5**
